# Supplementary material for: Luminescence turn-on/off sensing of biological iron by carbon dots in transferrin
Source: Royal Society of Chemistry journal article supplement (doi:10.1039/c5cp05890b), 2015-11-18
Supplement: c5cp05890b1.pdf [file c5cp05890b1.pdf]

# Supplementary Information

## **Luminescence turn-on/off sensing of biological iron by carbon dots in transferrin**

**Arpan Bhattacharya, Surajit Chatterjee, Vijaykant Khorwal, and Tushar Kanti Mukherjee\***

Discipline of Chemistry, Indian Institute of Technology Indore, Simrol Campus, Khandwa Road,  
Indore-452020, M.P., India

---

\* Corresponding author. E-mail: [tusharm@iiti.ac.in](mailto:tusharm@iiti.ac.in); Tel: +91-7312438738.

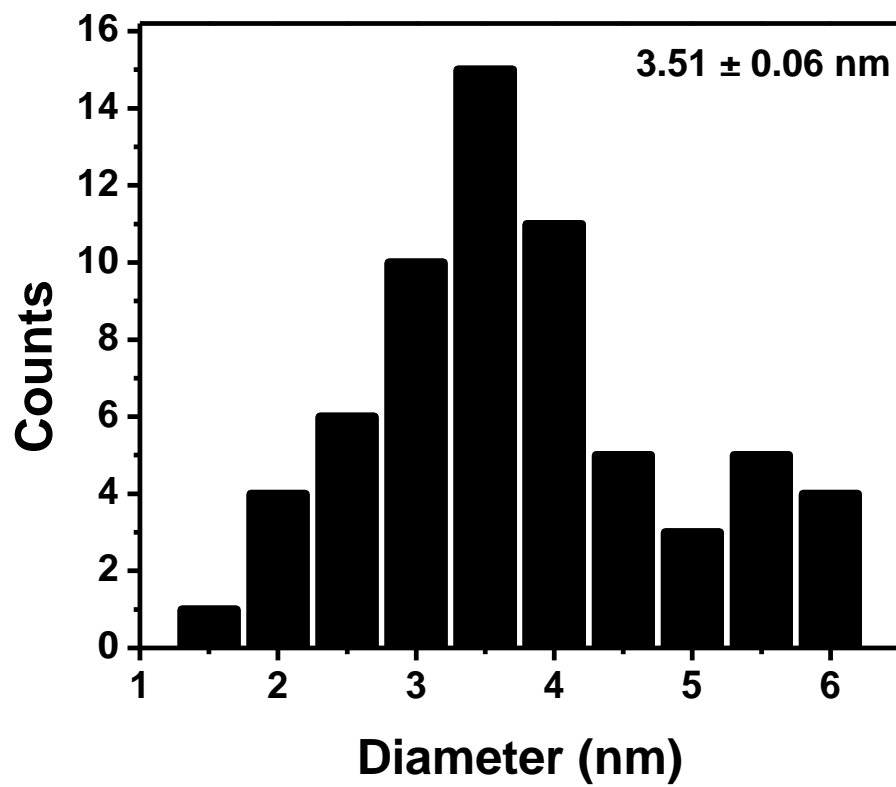

**Figure S1.** Size distribution histogram obtained from the TEM image.

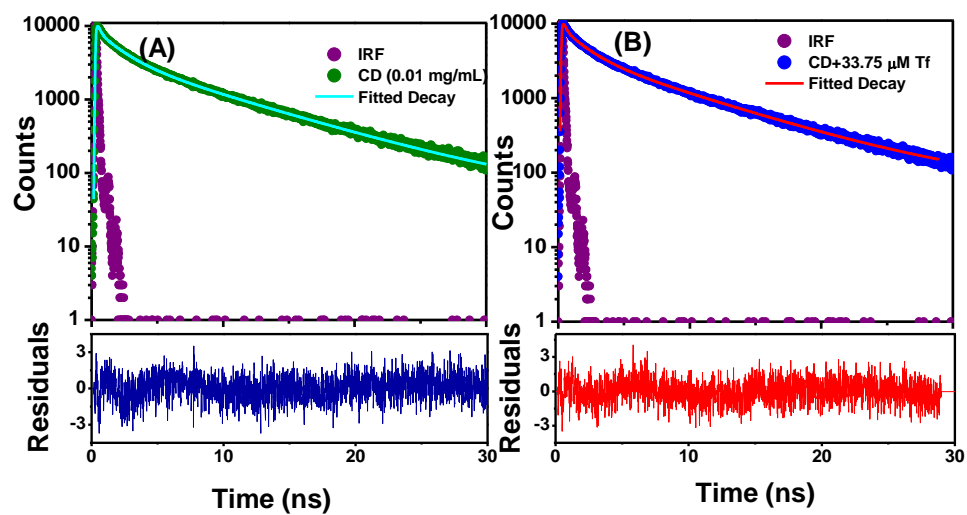

**Figure S2.** PL decay traces ( $\lambda_{\text{ex}}=376$  nm) of CDs in the (A) absence and (B) presence of 33.75  $\mu$ M Tf with their respective fits and residuals.
